# Supplementary material
Source: PubMed Central journal article supplement (PMC7385068)
Supplement: mmc1.pdf [file mmc1.pdf]

**Table S1.** Model-generated statewide estimates of occupied ICU beds and CKRT demand and capacity before the pandemic<sup>a</sup>

| State                | Total ICU beds <sup>b</sup> | Available ICU beds <sup>b</sup> | Occupied ICU beds <sup>c</sup> | Pre-COVID-19 CKRT demand <sup>d</sup> | CKRT capacity <sup>e</sup> |
|----------------------|-----------------------------|---------------------------------|--------------------------------|---------------------------------------|----------------------------|
| Alabama              | 1,870                       | 606                             | 1,264                          | 111                                   | 167                        |
| Alaska               | 130                         | 55                              | 75                             | 7                                     | 10                         |
| Arizona              | 1,742                       | 814                             | 928                            | 82                                    | 122                        |
| Arkansas             | 856                         | 362                             | 494                            | 43                                    | 65                         |
| California           | 8,131                       | 3,381                           | 4,750                          | 418                                   | 627                        |
| Colorado             | 1,264                       | 500                             | 764                            | 67                                    | 101                        |
| Connecticut          | 731                         | 285                             | 446                            | 39                                    | 59                         |
| Delaware             | 249                         | 63                              | 186                            | 16                                    | 25                         |
| District of Columbia | 401                         | 159                             | 242                            | 21                                    | 32                         |
| Florida              | 6,226                       | 2,044                           | 4,182                          | 368                                   | 552                        |
| Georgia              | 2,703                       | 752                             | 1,951                          | 172                                   | 258                        |
| Hawaii               | 219                         | 73                              | 146                            | 13                                    | 19                         |
| Idaho                | 333                         | 155                             | 178                            | 16                                    | 23                         |
| Illinois             | 3,426                       | 1,410                           | 2,016                          | 177                                   | 266                        |
| Indiana              | 2,358                       | 974                             | 1,384                          | 122                                   | 183                        |
| Iowa                 | 622                         | 293                             | 329                            | 29                                    | 43                         |
| Kansas               | 878                         | 391                             | 487                            | 43                                    | 64                         |
| Kentucky             | 1,447                       | 504                             | 943                            | 83                                    | 124                        |
| Louisiana            | 1,518                       | 632                             | 886                            | 78                                    | 117                        |
| Maine                | 288                         | 107                             | 181                            | 16                                    | 24                         |
| Maryland             | 1,227                       | 422                             | 805                            | 71                                    | 106                        |
| Massachusetts        | 1,555                       | 571                             | 984                            | 87                                    | 130                        |
| Michigan             | 2,749                       | 976                             | 1,773                          | 156                                   | 234                        |
| Minnesota            | 1,277                       | 452                             | 825                            | 73                                    | 109                        |
| Mississippi          | 931                         | 392                             | 539                            | 47                                    | 71                         |
| Missouri             | 2,092                       | 874                             | 1,218                          | 107                                   | 161                        |
| Montana              | 248                         | 113                             | 135                            | 12                                    | 18                         |
| Nebraska             | 548                         | 202                             | 346                            | 30                                    | 46                         |
| Nevada               | 1,118                       | 248                             | 870                            | 77                                    | 115                        |
| New Hampshire        | 252                         | 110                             | 142                            | 12                                    | 19                         |
| New Jersey           | 1,891                       | 846                             | 1,045                          | 92                                    | 138                        |
| New Mexico           | 460                         | 188                             | 272                            | 24                                    | 36                         |
| New York             | 4,420                       | 1,670                           | 2,750                          | 242                                   | 363                        |

**Table S1.** Model-generated statewide estimates of occupied ICU beds and CKRT demand and capacity before the pandemic<sup>a</sup> (continued)

| State          | Total ICU beds <sup>b</sup> | Available ICU beds <sup>b</sup> | Occupied ICU beds <sup>c</sup> | Pre-COVID-19 CKRT demand <sup>d</sup> | CKRT capacity <sup>e</sup> |
|----------------|-----------------------------|---------------------------------|--------------------------------|---------------------------------------|----------------------------|
| North Carolina | 3,168                       | 911                             | 2,257                          | 199                                   | 298                        |
| North Dakota   | 278                         | 95                              | 183                            | 16                                    | 24                         |
| Ohio           | 3,622                       | 1,297                           | 2,325                          | 205                                   | 307                        |
| Oklahoma       | 1,164                       | 427                             | 737                            | 65                                    | 97                         |
| Oregon         | 837                         | 336                             | 501                            | 44                                    | 66                         |
| Pennsylvania   | 3,643                       | 1,427                           | 2,216                          | 195                                   | 293                        |
| Rhode Island   | 279                         | 77                              | 202                            | 18                                    | 27                         |
| South Carolina | 1,459                       | 469                             | 990                            | 87                                    | 131                        |
| South Dakota   | 150                         | 75                              | 75                             | 7                                     | 10                         |
| Tennessee      | 2,309                       | 603                             | 1,706                          | 150                                   | 225                        |
| Texas          | 7,149                       | 2,573                           | 4,576                          | 403                                   | 604                        |
| Utah           | 687                         | 328                             | 359                            | 32                                    | 47                         |
| Vermont        | 94                          | 52                              | 42                             | 4                                     | 6                          |
| Virginia       | 2,007                       | 698                             | 1,309                          | 115                                   | 173                        |
| Washington     | 1,493                       | 525                             | 968                            | 85                                    | 128                        |
| West Virginia  | 643                         | 223                             | 420                            | 37                                    | 55                         |
| Wisconsin      | 1,506                       | 676                             | 830                            | 73                                    | 110                        |
| Wyoming        | 102                         | 65                              | 37                             | 3                                     | 5                          |
| <b>US</b>      | <b>84,750</b>               | <b>31,481</b>                   | <b>53,269</b>                  | <b>4,688</b>                          | <b>7,032</b>               |

Abbreviations: ICU, intensive care unit; COVID-19, coronavirus disease 2019; CKRT, continuous kidney replacement therapy; AKI 3D, acute kidney injury stage 3 requiring dialysis.

<sup>a</sup>This table demonstrates how we estimated pre-COVID-19 CKRT demand and CKRT capacity using data on total ICU beds and average daily occupancy rates. The unit for demand and capacity is CKRT machines. Minor discrepancies in numerical values in the table are due to rounding.

<sup>b</sup>These estimates represent a cross-section of time prior to the COVID-19 pandemic based on data from the Harvard Global Health Institute model, the 2018 American Hospital Association database, and the American Hospital Directory.<sup>1-3</sup>

<sup>c</sup>Occupied ICU beds = (Total ICU beds) – (Available ICU beds)

<sup>d</sup>Pre-COVID-19 CKRT demand = (Occupied ICU beds) \* (Prevalence of AKI 3D among ICU patients pre-COVID-19)

<sup>e</sup>CKRT capacity = (Pre-COVID-19 CKRT demand) \* (CKRT capacity multiplier)

**Table S2.** Model-generated initial CKRT shortage date in the base-case, best-case, and worst-case scenarios during the initial wave of the pandemic<sup>a</sup>

| State                | Initial CKRT Shortage Date <sup>b</sup> |                        |                         |
|----------------------|-----------------------------------------|------------------------|-------------------------|
|                      | Base-case <sup>c</sup>                  | Best-case <sup>d</sup> | Worst-case <sup>e</sup> |
| Alabama              | -                                       | -                      | -                       |
| Alaska               | -                                       | -                      | -                       |
| Arizona              | -                                       | -                      | 4/24/2020               |
| Arkansas             | -                                       | -                      | 7/30/2020               |
| California           | -                                       | -                      | 4/15/2020               |
| Colorado             | -                                       | -                      | 4/5/2020                |
| Connecticut          | 4/10/2020                               | 4/18/2020              | 3/31/2020               |
| Delaware             | -                                       | -                      | 4/11/2020               |
| District of Columbia | -                                       | -                      | 4/8/2020                |
| Florida              | -                                       | -                      | -                       |
| Georgia              | -                                       | -                      | 4/7/2020                |
| Hawaii               | -                                       | -                      | -                       |
| Idaho                | -                                       | -                      | -                       |
| Illinois             | -                                       | -                      | 4/5/2020                |
| Indiana              | -                                       | -                      | 4/9/2020                |
| Iowa                 | -                                       | -                      | 4/18/2020               |
| Kansas               | -                                       | -                      | -                       |
| Kentucky             | -                                       | -                      | -                       |
| Louisiana            | 4/15/2020                               | -                      | 3/27/2020               |
| Maine                | -                                       | -                      | 7/29/2020               |
| Maryland             | 4/19/2020                               | -                      | 4/5/2020                |
| Massachusetts        | 4/21/2020                               | -                      | 4/6/2020                |
| Michigan             | 4/14/2020                               | -                      | 3/31/2020               |
| Minnesota            | -                                       | -                      | 4/22/2020               |
| Mississippi          | -                                       | -                      | 4/12/2020               |
| Missouri             | -                                       | -                      | -                       |
| Montana              | -                                       | -                      | -                       |
| Nebraska             | -                                       | -                      | 7/30/2020               |
| Nevada               | -                                       | -                      | -                       |
| New Hampshire        | -                                       | -                      | 4/12/2020               |
| New Jersey           | 4/6/2020                                | 4/13/2020              | 3/28/2020               |
| New Mexico           | -                                       | -                      | 4/18/2020               |
| New York             | 4/2/2020                                | 4/9/2020               | 3/25/2020               |

**Table S2.** Model-generated initial CKRT shortage date in the base-case, best-case, and worst-case scenarios during the initial wave of the pandemic<sup>a</sup> (continued)

| State          | Initial CKRT Shortage Date <sup>b</sup> |                        |                         |
|----------------|-----------------------------------------|------------------------|-------------------------|
|                | Base-case <sup>c</sup>                  | Best-case <sup>d</sup> | Worst-case <sup>e</sup> |
| North Carolina | -                                       | -                      | -                       |
| North Dakota   | -                                       | -                      | -                       |
| Ohio           | -                                       | -                      | 4/20/2020               |
| Oklahoma       | -                                       | -                      | -                       |
| Oregon         | -                                       | -                      | -                       |
| Pennsylvania   | -                                       | -                      | 4/9/2020                |
| Rhode Island   | -                                       | -                      | 4/7/2020                |
| South Carolina | -                                       | -                      | 6/20/2020               |
| South Dakota   | -                                       | -                      | 5/5/2020                |
| Tennessee      | -                                       | -                      | -                       |
| Texas          | -                                       | -                      | -                       |
| Utah           | -                                       | -                      | 8/3/2020                |
| Vermont        | -                                       | -                      | 3/27/2020               |
| Virginia       | -                                       | -                      | 4/16/2020               |
| Washington     | -                                       | -                      | 3/25/2020               |
| West Virginia  | -                                       | -                      | -                       |
| Wisconsin      | -                                       | -                      | 4/14/2020               |
| Wyoming        | -                                       | -                      | 5/23/2020               |

Abbreviations: CKRT, continuous kidney replacement therapy; COVID-19, coronavirus disease 2019; AKI 3D, acute kidney injury stage 3 requiring dialysis;

<sup>a</sup>This table demonstrates the model-generated initial CKRT shortage date by state, which is the first date when CKRT demand (according to point estimates) exceeds CKRT capacity in the scenarios listed. However, as the COVID-19 pandemic is dynamic, the projected timeline of the epidemic depends on changing events - such as the successful implementation of social distancing policies - and can be imprecise.<sup>4</sup> Short-term quantitative projections, such as the number of machines in shortage may be more reliable than temporal projections, such as the initial CKRT shortage date.<sup>5</sup>

<sup>c</sup>The base-case scenario projected by the model is obtained using the base-case values of the input parameters listed in Table 1.

<sup>d</sup>The best-case scenario projected by the model is obtained when the input parameters are varied simultaneously as follows:

- i. Incidence of AKI 3D requiring CKRT among hospitalized patients with COVID-19: 4.8%
- ii. Time from hospitalization to AKI 3D: 10 days
- iii. Duration of CKRT: 6 days
- iv. Non-COVID-19 CKRT demand multiplier during the initial wave of the COVID-19 pandemic: 0.25
- v. Prevalence of AKI 3D among ICU patients pre-COVID-19: 11.0%
- vi. CKRT capacity multiplier: 1.75

<sup>e</sup>The worst-case scenario projected by the model is obtained when the input parameters are varied simultaneously as follows:

- i. Incidence of AKI 3D requiring CKRT among hospitalized patients with COVID-19: 6.9%
- ii. Time from hospitalization to AKI 3D: 5 days
- iii. Duration of CKRT: 9 days
- iv. Non-COVID-19 CKRT demand multiplier during the initial wave of the COVID-19 pandemic: 0.75
- v. Prevalence of AKI 3D among ICU patients pre-COVID-19: 6.6%
- vi. CKRT capacity multiplier: 1.25

**Table S3.** Effect of varying the incidence of AKI 3D requiring CKRT among hospitalized patients with COVID-19 on a) nationwide CKRT shortage at peak resource use in each state and b) number of states projected to encounter CKRT shortage during the initial wave of the pandemic<sup>a</sup>

| <b>Incidence of AKI 3D requiring CKRT among hospitalized patients with COVID-19 (%)</b> | <b>Nationwide CKRT shortage at peak resource use in each state (95% UI)<sup>b</sup></b> | <b>Number of states projected to encounter CKRT shortage during the initial wave of the COVID-19 pandemic</b> | <b>List of states projected to encounter CKRT shortage during the initial wave of the COVID-19 pandemic</b> |
|-----------------------------------------------------------------------------------------|-----------------------------------------------------------------------------------------|---------------------------------------------------------------------------------------------------------------|-------------------------------------------------------------------------------------------------------------|
| 4.8                                                                                     | 945 (795 – 1,359)                                                                       | 4                                                                                                             | CT, MA, NJ, NY                                                                                              |
| 5.2 (base-case)                                                                         | 1,088 (910 – 1,568)                                                                     | 6                                                                                                             | CT, MD, MA, MI, NJ, NY                                                                                      |
| 6.9                                                                                     | 1,723 (1,474 – 2,538)                                                                   | 8                                                                                                             | CT, LA, MD, MA, MI, NJ, NY, RI                                                                              |

Abbreviations: AKI 3D, acute kidney injury stage 3 requiring dialysis; CKRT, continuous kidney replacement therapy; COVID-19, coronavirus disease 2019; UI: uncertainty interval.

<sup>a</sup>This table demonstrates the results when the incidence of AKI 3D requiring CKRT among hospitalized patients with COVID-19 is varied between 4.8% and 6.9%, as based on published data.<sup>6-10</sup>

<sup>b</sup>We derived these estimates from the Institute for Health Metrics and Evaluation model and present them as means with 95% UI.<sup>11</sup>

**Table S4.** Effect of varying the non-COVID-19 CKRT demand multiplier during the COVID-19 pandemic on model-generated a) nationwide CKRT shortage at peak resource use in each state and b) number of states projected to encounter CKRT shortage during the initial wave of the pandemic<sup>a</sup>

| <b>Non-COVID-19 CKRT demand multiplier during the COVID-19 pandemic</b> | <b>Nationwide CKRT shortage at peak resource use in each state (95% UI)<sup>b</sup></b> | <b>Number of states projected to encounter CKRT shortage during the initial wave of the COVID-19 pandemic</b> | <b>List of states projected to encounter CKRT shortage during the initial wave of the COVID-19 pandemic</b> |
|-------------------------------------------------------------------------|-----------------------------------------------------------------------------------------|---------------------------------------------------------------------------------------------------------------|-------------------------------------------------------------------------------------------------------------|
| 0.25                                                                    | 986 (835 – 1,415)                                                                       | 4                                                                                                             | CT, MA, NJ, NY                                                                                              |
| 0.40 (base-case)                                                        | 1,088 (910 – 1,568)                                                                     | 6                                                                                                             | CT, MD, MA, MI, NJ, NY                                                                                      |
| 0.75                                                                    | 1,388 (1,172 – 2,042)                                                                   | 8                                                                                                             | CT, LA, MD, MA, MI, NJ, NY, RI                                                                              |

Abbreviations: COVID-19, coronavirus disease 2019; CKRT, continuous kidney replacement therapy; UI: uncertainty interval.

<sup>a</sup>This table demonstrates the results when the non-COVID-19 CKRT demand multiplier is varied between 0.25 and 0.75. This range was informed by the Harvard Global Health Institute Model and expert opinion from nephrologists at two hospitals.<sup>1</sup>

<sup>b</sup>We derived these estimates from the Institute for Health Metrics and Evaluation model and present them as means with 95% UI.<sup>11</sup>

**Table S5.** Effect of varying the duration of CKRT among hospitalized patients with COVID-19 on a) nationwide CKRT shortage at peak resource use in each state and b) number of states projected to encounter CKRT shortage during the initial wave of the pandemic<sup>a</sup>

| <b>Duration of CKRT among hospitalized patients with COVID-19 (Days)</b> | <b>Nationwide CKRT shortage at peak resource use in each state (95% UI)<sup>b</sup></b> | <b>Number of states projected to encounter CKRT shortage during the initial wave of the COVID-19 pandemic</b> | <b>List of states projected to encounter CKRT shortage during the initial wave of the COVID-19 pandemic</b> |
|--------------------------------------------------------------------------|-----------------------------------------------------------------------------------------|---------------------------------------------------------------------------------------------------------------|-------------------------------------------------------------------------------------------------------------|
| 6 (base-case)                                                            | 1,088 (910 – 1,568)                                                                     | 6                                                                                                             | CT, MD, MA, MI, NJ, NY                                                                                      |
| 9                                                                        | 2,067 (1,738 – 3,033)                                                                   | 8                                                                                                             | CT, LA, MD, MA, MI, NJ, NY, RI                                                                              |

Abbreviations: CKRT, continuous kidney replacement therapy; COVID-19, coronavirus disease 2019; UI: uncertainty interval.

<sup>a</sup>This table demonstrates the results when the duration of CKRT is varied between 6 and 9 days. This range was informed by expert opinion from nephrologists at two hospitals and peer review.<sup>6,13</sup>

<sup>b</sup>We derived these estimates from the Institute for Health Metrics and Evaluation model and present them as means with 95% UI.<sup>11</sup>

**Table S6.** Effect of varying the time from hospitalization to AKI 3D requiring CKRT among hospitalized patients with COVID-19 on a) nationwide CKRT shortage at peak resource use in each state and b) number of states projected to encounter CKRT shortage during the initial wave of the pandemic<sup>a</sup>

| <b>Time from hospitalization to AKI 3D requiring CKRT among hospitalized patients with COVID-19 (days)</b> | <b>Nationwide CKRT shortage at peak resource use in each state (95% UI)<sup>b</sup></b> | <b>Number of states projected to encounter CKRT shortage during the initial wave of the COVID-19 pandemic</b> | <b>List of states projected to encounter CKRT shortage during the initial wave of the COVID-19 pandemic</b> |
|------------------------------------------------------------------------------------------------------------|-----------------------------------------------------------------------------------------|---------------------------------------------------------------------------------------------------------------|-------------------------------------------------------------------------------------------------------------|
| 5                                                                                                          | 1,088 (910 – 1,568)                                                                     | 6                                                                                                             | CT, MD, MA, MI, NJ, NY                                                                                      |
| 7 (base-case)                                                                                              | 1,088 (910 – 1,568)                                                                     | 6                                                                                                             | CT, MD, MA, MI, NJ, NY                                                                                      |
| 10                                                                                                         | 1,088 (910 – 1,568)                                                                     | 6                                                                                                             | CT, MD, MA, MI, NJ, NY                                                                                      |

Abbreviations: AKI 3D, acute kidney injury stage 3 requiring dialysis; CKRT, continuous kidney replacement therapy; COVID-19, coronavirus disease 2019; UI: uncertainty interval.

<sup>a</sup>This table demonstrates the results when the time from hospitalization to AKI 3D requiring CKRT among hospitalized patients with COVID-19 is varied between 5 and 10 days. This range was informed by the time to hospitalization, time to ICU admission and time to AKI 3D from a study by Zhou et al. and expert opinion.<sup>12</sup>

<sup>b</sup>We derived these estimates from the Institute for Health Metrics and Evaluation model and present them as means with 95% UI.<sup>11</sup>



**Table S7.** Effect of varying the prevalence of AKI 3D among ICU patients pre-COVID-19 on model-generated a) nationwide CKRT shortage at peak resource use in each state and b) number of states projected to encounter CKRT shortage during the initial wave of the pandemic<sup>a</sup>

| <b>Prevalence of AKI 3D among ICU patients pre-COVID-19 (%)</b> | <b>Nationwide CKRT shortage at peak resource use in each state (95% UI)<sup>b</sup></b> | <b>Number of states projected to encounter CKRT shortage during the initial wave of the COVID-19 pandemic</b> | <b>List of states projected to encounter CKRT shortage during the initial wave of the COVID-19 pandemic</b> |
|-----------------------------------------------------------------|-----------------------------------------------------------------------------------------|---------------------------------------------------------------------------------------------------------------|-------------------------------------------------------------------------------------------------------------|
| 6.6                                                             | 1,302 (1,114 – 1,919)                                                                   | 8                                                                                                             | CT, LA, MD, MA, MI, NJ, NY, RI                                                                              |
| 8.8 (base-case)                                                 | 1,088 (910 – 1,568)                                                                     | 6                                                                                                             | CT, MD, MA, MI, NJ, NY                                                                                      |
| 11.0                                                            | 919 (785 – 1,303)                                                                       | 3                                                                                                             | CT, NJ, NY                                                                                                  |

Abbreviations: AKI 3D, acute kidney injury stage 3 requiring dialysis; ICU, intensive care unit; COVID-19, coronavirus disease 2019; CKRT, continuous kidney replacement therapy.

<sup>a</sup>This table demonstrates the results when the prevalence of AKI 3D among ICU patients pre-COVID-19 is varied between 6.6% and 11.0%. This range was informed by expert opinion from nephrologists at two hospitals.<sup>14</sup> Based on model assumptions, a higher AKI 3D prevalence among ICU patients pre-COVID-19 would result in a higher estimate for CKRT capacity.

<sup>b</sup>We derived these estimates from the Institute for Health Metrics and Evaluation model and present them as means with 95% UI.<sup>11</sup>

**Table S8.** Effect of varying the CKRT capacity multiplier on a) nationwide CKRT shortage at peak resource use in each state and b) number of states projected to encounter CKRT shortage during the initial wave of the pandemic<sup>a</sup>

| <b>CKRT capacity multiplier</b> | <b>Nationwide CKRT shortage at peak resource use in each state (95% UI)<sup>b</sup></b> | <b>Number of states projected to encounter CKRT shortage during the initial wave of the COVID-19 pandemic</b> | <b>List of states projected to encounter CKRT shortage during the initial wave of the COVID-19 pandemic</b> |
|---------------------------------|-----------------------------------------------------------------------------------------|---------------------------------------------------------------------------------------------------------------|-------------------------------------------------------------------------------------------------------------|
| 1.25                            | 1,282 (1,094 – 1,880)                                                                   | 8                                                                                                             | CT, LA, MD, MA, MI, NJ, NY, RI                                                                              |
| 1.5 (base-case)                 | 1,088 (910 – 1,568)                                                                     | 6                                                                                                             | CT, MD, MA, MI, NJ, NY                                                                                      |
| 1.75                            | 933 (794 – 1,325)                                                                       | 3                                                                                                             | CT, NJ, NY                                                                                                  |

Abbreviations: CKRT, continuous kidney replacement therapy; COVID-19, coronavirus disease 2019.

<sup>a</sup>This table demonstrates the results when the CKRT capacity multiplier is varied between 1.25 and 1.75. This range was informed by expert opinion from nephrologists at two hospitals.

<sup>b</sup>We derived these estimates from the Institute for Health Metrics and Evaluation model and present them as means with 95% UI.<sup>11</sup>

**Table S9.** Effect of varying the IHME model version on a) nationwide CKRT shortage at peak resource use in each state and b) number of states projected to encounter CKRT shortage during the initial wave of the pandemic<sup>a</sup>

| <b>IHME model version</b> | <b>Nationwide CKRT shortage at peak resource use in each state (95% UI)<sup>b</sup></b> | <b>Number of states projected to encounter CKRT shortage during the initial wave of the COVID-19 pandemic</b> | <b>List of states projected to encounter CKRT shortage during the initial wave of the COVID-19 pandemic</b> |
|---------------------------|-----------------------------------------------------------------------------------------|---------------------------------------------------------------------------------------------------------------|-------------------------------------------------------------------------------------------------------------|
| 06/10/2020 (base-case)    | 1,088 (910 – 1,568)                                                                     | 6                                                                                                             | CT, MD, MA, MI, NJ, NY                                                                                      |
| 04/22/2020                | 1,239 (1,039 – 3,365)                                                                   | 7                                                                                                             | CT, LA, MD, MA, MI, NJ, NY                                                                                  |

Abbreviations: IHME: Institute for Health Metrics and Evaluation; AKI 3D, acute kidney injury stage 3 requiring dialysis; CKRT, continuous kidney replacement therapy; COVID-19, coronavirus disease 2019; UI: uncertainty interval.

<sup>a</sup>This table demonstrates the results when the IHME model estimates are varied between the 06/10/2020 version and the 04/22/2020.<sup>11</sup> The 04/22/2020 version estimated hospitalizations using a combination of death rates from COVID-19 and assumptions about the effect of social interventions on the spread of COVID-19. This older version has been criticized as it did not specifically account for COVID-19 infection transmission characteristics – traditionally modeled under a susceptible, exposed, infectious, recovered (SEIR) framework.<sup>5</sup> IHME has since updated its model and the 06/10/2020 IHME version utilizes a multi-stage hybrid model incorporating COVID-19 transmission characteristics, death rates, and the impact of social interventions.<sup>11</sup>

<sup>b</sup>We derived these estimates from the Institute for Health Metrics and Evaluation model and present them as means with 95% UI.<sup>11</sup>

**Table S10.** Multi-way sensitivity analysis assessing CKRT demand, capacity, and shortage at peak resource use during the initial wave of the COVID-19 pandemic; best-case scenario<sup>a</sup>

| State                | CKRT demand at peak resource use (95% UI) <sup>b</sup> | CKRT capacity | Projected CKRT shortage | CKRT shortage at peak resource use (95% UI) <sup>b</sup> |
|----------------------|--------------------------------------------------------|---------------|-------------------------|----------------------------------------------------------|
| Alabama              | 48 (46-51)                                             | 243           | No                      | -                                                        |
| Alaska               | 3 (3-3)                                                | 14            | No                      | -                                                        |
| Arizona              | 68 (49-207)                                            | 179           | Possible                | 0 (0-28)                                                 |
| Arkansas             | 22 (16-51)                                             | 95            | No                      | -                                                        |
| California           | 229 (215-246)                                          | 914           | No                      | -                                                        |
| Colorado             | 51 (45-214)                                            | 147           | Possible                | 0 (0-67)                                                 |
| <b>Connecticut</b>   | <b>130 (115-148)</b>                                   | <b>86</b>     | <b>Yes</b>              | <b>44 (29-62)</b>                                        |
| Delaware             | 16 (14-18)                                             | 36            | No                      | -                                                        |
| District of Columbia | 21 (19-23)                                             | 47            | No                      | -                                                        |
| Florida              | 172 (163-196)                                          | 805           | No                      | -                                                        |
| Georgia              | 107 (96-173)                                           | 376           | No                      | -                                                        |
| Hawaii               | 5 (5-6)                                                | 28            | No                      | -                                                        |
| Idaho                | 7 (7-8)                                                | 34            | No                      | -                                                        |
| Illinois             | 190 (173-209)                                          | 388           | No                      | -                                                        |
| Indiana              | 89 (83-95)                                             | 266           | No                      | -                                                        |
| Iowa                 | 25 (23-30)                                             | 63            | No                      | -                                                        |
| Kansas               | 20 (18-21)                                             | 94            | No                      | -                                                        |
| Kentucky             | 37 (36-40)                                             | 182           | No                      | -                                                        |
| Louisiana            | 105 (96-115)                                           | 171           | No                      | -                                                        |
| Maine                | 8 (7-18)                                               | 35            | No                      | -                                                        |
| Maryland             | 116 (99-135)                                           | 155           | No                      | -                                                        |
| Massachusetts        | 141 (130-154)                                          | 189           | No                      | -                                                        |
| Michigan             | 227 (208-247)                                          | 341           | No                      | -                                                        |
| Minnesota            | 47 (43-51)                                             | 159           | No                      | -                                                        |
| Mississippi          | 36 (33-40)                                             | 104           | No                      | -                                                        |
| Missouri             | 52 (50-55)                                             | 234           | No                      | -                                                        |
| Montana              | 4 (4-4)                                                | 26            | No                      | -                                                        |
| Nebraska             | 16 (13-43)                                             | 67            | No                      | -                                                        |
| Nevada               | 35 (33-37)                                             | 167           | No                      | -                                                        |
| New Hampshire        | 12 (11-15)                                             | 27            | No                      | -                                                        |
| <b>New Jersey</b>    | <b>373 (347-403)</b>                                   | <b>201</b>    | <b>Yes</b>              | <b>172 (145-202)</b>                                     |
| New Mexico           | 19 (17-38)                                             | 52            | No                      | -                                                        |
| <b>New York</b>      | <b>927 (853-1,005)</b>                                 | <b>529</b>    | <b>Yes</b>              | <b>398 (324-476)</b>                                     |

**Table S10.** Multi-way sensitivity analysis assessing CKRT demand, capacity, and shortage at peak resource use during the initial wave of the COVID-19 pandemic; best-case scenario<sup>a</sup> (continued)

| State          | CKRT demand at peak resource use (95% UI) <sup>b</sup> | CKRT capacity | Projected CKRT shortage | CKRT shortage at peak resource use (95% UI) <sup>b</sup> |
|----------------|--------------------------------------------------------|---------------|-------------------------|----------------------------------------------------------|
| North Carolina | 84 (79-118)                                            | 434           | No                      | -                                                        |
| North Dakota   | 7 (6-15)                                               | 35            | No                      | -                                                        |
| Ohio           | 118 (110-126)                                          | 448           | No                      | -                                                        |
| Oklahoma       | 29 (28-31)                                             | 142           | No                      | -                                                        |
| Oregon         | 18 (17-19)                                             | 96            | No                      | -                                                        |
| Pennsylvania   | 209 (193-228)                                          | 427           | No                      | -                                                        |
| Rhode Island   | 23 (20-25)                                             | 39            | No                      | -                                                        |
| South Carolina | 48 (37-115)                                            | 191           | No                      | -                                                        |
| South Dakota   | 4 (4-5)                                                | 14            | No                      | -                                                        |
| Tennessee      | 66 (53-129)                                            | 328           | No                      | -                                                        |
| Texas          | 168 (161-177)                                          | 881           | No                      | -                                                        |
| Utah           | 15 (12-29)                                             | 69            | No                      | -                                                        |
| Vermont        | 2 (2-3)                                                | 8             | No                      | -                                                        |
| Virginia       | 76 (71-80)                                             | 252           | No                      | -                                                        |
| Washington     | 54 (51-56)                                             | 186           | No                      | -                                                        |
| West Virginia  | 14 (13-15)                                             | 81            | No                      | -                                                        |
| Wisconsin      | 36 (34-41)                                             | 160           | No                      | -                                                        |
| Wyoming        | 2 (2-5)                                                | 7             | No                      | -                                                        |

Abbreviations: CKRT, continuous kidney replacement therapy; COVID-19, coronavirus disease 2019; UI, uncertainty interval; AKI 3D, acute kidney injury stage 3 requiring dialysis.

<sup>a</sup>This table demonstrates the lowest shortage in CKRT projected by the model (within the model assumptions) when the input parameters are as follows:

- i. Incidence of AKI 3D requiring CKRT among hospitalized patients with COVID-19: 4.8%
- ii. Time from hospitalization to AKI 3D: 10 days
- iii. Duration of CKRT: 6 days
- iv. Non-COVID-19 CKRT demand multiplier during the initial wave of the COVID-19 pandemic: 0.25
- v. Prevalence of AKI 3D among ICU patients pre-COVID-19: 11.0%
- vi. CKRT capacity multiplier: 1.75

The unit for demand and capacity is CKRT machines. CKRT capacity is derived from average daily ICU bed occupancy rates (see Table S1). The bolded rows represent states that are projected to encounter a shortage (where CKRT capacity is below the 95% UI of CKRT demand). The italicized rows represent states that could encounter a possible shortage (where CKRT capacity is within the 95% UI of CKRT demand). Minor discrepancies in numerical values in the table are due to rounding.

<sup>b</sup>We derived these estimates from the Institute for Health Metrics and Evaluation model and present them as means with 95% UI.<sup>11</sup>

**Table S11.** Multi-way sensitivity analysis assessing CKRT demand, capacity, and shortage at peak resource use during the initial wave of the COVID-19 pandemic; worst-case scenario<sup>a</sup>

| State                       | CKRT demand at peak resource use (95% UI) <sup>b</sup> | CKRT capacity | Projected CKRT shortage | CKRT shortage at peak resource use (95% UI) <sup>b</sup> |
|-----------------------------|--------------------------------------------------------|---------------|-------------------------|----------------------------------------------------------|
| Alabama                     | 91 (87-98)                                             | 104           | No                      | -                                                        |
| Alaska                      | 5 (4-5)                                                | 6             | No                      | -                                                        |
| <b>Arizona</b>              | <b>137 (95-446)</b>                                    | <b>77</b>     | <b>Yes</b>              | <b>60 (19-370)</b>                                       |
| <i>Arkansas</i>             | <i>44 (29-117)</i>                                     | <i>41</i>     | <i>Possible</i>         | <i>3 (0-77)</i>                                          |
| <b>California</b>           | <b>447 (415-483)</b>                                   | <b>392</b>    | <b>Yes</b>              | <b>55 (23-91)</b>                                        |
| <b>Colorado</b>             | <b>102 (89-469)</b>                                    | <b>63</b>     | <b>Yes</b>              | <b>39 (26-406)</b>                                       |
| <b>Connecticut</b>          | <b>274 (242-311)</b>                                   | <b>37</b>     | <b>Yes</b>              | <b>237 (205-275)</b>                                     |
| <b>Delaware</b>             | <b>32 (29-35)</b>                                      | <b>15</b>     | <b>Yes</b>              | <b>16 (13-20)</b>                                        |
| <b>District of Columbia</b> | <b>43 (39-48)</b>                                      | <b>20</b>     | <b>Yes</b>              | <b>23 (19-28)</b>                                        |
| <i>Florida</i>              | <i>330 (309-391)</i>                                   | <i>345</i>    | <i>Possible</i>         | <i>0 (0-46)</i>                                          |
| <b>Georgia</b>              | <b>211 (188-366)</b>                                   | <b>161</b>    | <b>Yes</b>              | <b>50 (27-205)</b>                                       |
| Hawaii                      | 10 (9-11)                                              | 12            | No                      | -                                                        |
| <i>Idaho</i>                | <i>14 (13-16)</i>                                      | <i>15</i>     | <i>Possible</i>         | <i>0 (0-2)</i>                                           |
| <b>Illinois</b>             | <b>389 (353-431)</b>                                   | <b>166</b>    | <b>Yes</b>              | <b>223 (186-265)</b>                                     |
| <b>Indiana</b>              | <b>178 (166-192)</b>                                   | <b>114</b>    | <b>Yes</b>              | <b>64 (52-78)</b>                                        |
| <b>Iowa</b>                 | <b>50 (46-63)</b>                                      | <b>27</b>     | <b>Yes</b>              | <b>23 (18-36)</b>                                        |
| Kansas                      | 37 (34-40)                                             | 40            | No                      | -                                                        |
| Kentucky                    | 71 (68-78)                                             | 78            | No                      | -                                                        |
| <b>Louisiana</b>            | <b>216 (197-238)</b>                                   | <b>73</b>     | <b>Yes</b>              | <b>143 (124-164)</b>                                     |
| <i>Maine</i>                | <i>17 (13-41)</i>                                      | <i>15</i>     | <i>Possible</i>         | <i>2 (0-26)</i>                                          |
| <b>Maryland</b>             | <b>241 (204-283)</b>                                   | <b>66</b>     | <b>Yes</b>              | <b>174 (138-216)</b>                                     |
| <b>Massachusetts</b>        | <b>293 (269-320)</b>                                   | <b>81</b>     | <b>Yes</b>              | <b>212 (187-239)</b>                                     |
| <b>Michigan</b>             | <b>467 (428-510)</b>                                   | <b>146</b>    | <b>Yes</b>              | <b>321 (281-364)</b>                                     |
| <b>Minnesota</b>            | <b>93 (86-101)</b>                                     | <b>68</b>     | <b>Yes</b>              | <b>25 (18-33)</b>                                        |
| <b>Mississippi</b>          | <b>70 (65-80)</b>                                      | <b>44</b>     | <b>Yes</b>              | <b>26 (20-36)</b>                                        |
| <i>Missouri</i>             | <i>100 (96-106)</i>                                    | <i>100</i>    | <i>Possible</i>         | <i>0 (0-5)</i>                                           |
| Montana                     | 7 (7-7)                                                | 11            | No                      | -                                                        |
| <i>Nebraska</i>             | <i>32 (25-105)</i>                                     | <i>29</i>     | <i>Possible</i>         | <i>4 (0-77)</i>                                          |
| Nevada                      | 66 (63-70)                                             | 72            | No                      | -                                                        |
| <b>New Hampshire</b>        | <b>25 (22-31)</b>                                      | <b>12</b>     | <b>Yes</b>              | <b>13 (10-19)</b>                                        |
| <b>New Jersey</b>           | <b>789 (731-852)</b>                                   | <b>86</b>     | <b>Yes</b>              | <b>702 (644-765)</b>                                     |
| <b>New Mexico</b>           | <b>38 (34-83)</b>                                      | <b>22</b>     | <b>Yes</b>              | <b>15 (11-61)</b>                                        |
| <b>New York</b>             | <b>1,934 (1,777-2,104)</b>                             | <b>227</b>    | <b>Yes</b>              | <b>1,708 (1,550-1,877)</b>                               |

**Table S11.** Multi-way sensitivity analysis assessing CKRT demand, capacity, and shortage at peak resource use during the initial wave of the COVID-19 pandemic; worst-case scenario<sup>a</sup> (continued)

| State                 | CKRT demand at peak resource use (95% UI) <sup>b</sup> | CKRT capacity | Projected CKRT shortage | CKRT shortage at peak resource use (95% UI) <sup>b</sup> |
|-----------------------|--------------------------------------------------------|---------------|-------------------------|----------------------------------------------------------|
| <i>North Carolina</i> | <i>162 (147-244)</i>                                   | <i>186</i>    | <i>Possible</i>         | <i>0 (0-57)</i>                                          |
| <i>North Dakota</i>   | <i>13 (12-32)</i>                                      | <i>15</i>     | <i>Possible</i>         | <i>0 (0-17)</i>                                          |
| <b>Ohio</b>           | <b>230 (215-248)</b>                                   | <b>192</b>    | <b>Yes</b>              | <b>38 (23-56)</b>                                        |
| Oklahoma              | 56 (53-59)                                             | 61            | No                      | -                                                        |
| Oregon                | 34 (32-36)                                             | 41            | No                      | -                                                        |
| <b>Pennsylvania</b>   | <b>429 (393-469)</b>                                   | <b>183</b>    | <b>Yes</b>              | <b>246 (210-286)</b>                                     |
| <b>Rhode Island</b>   | <b>47 (42-52)</b>                                      | <b>17</b>     | <b>Yes</b>              | <b>30 (25-35)</b>                                        |
| <i>South Carolina</i> | <i>95 (71-253)</i>                                     | <i>82</i>     | <i>Possible</i>         | <i>13 (0-171)</i>                                        |
| <b>South Dakota</b>   | <b>9 (8-11)</b>                                        | <b>6</b>      | <b>Yes</b>              | <b>3 (1-5)</b>                                           |
| <i>Tennessee</i>      | <i>128 (97-285)</i>                                    | <i>141</i>    | <i>Possible</i>         | <i>0 (0-144)</i>                                         |
| Texas                 | 318 (302-337)                                          | 378           | No                      | -                                                        |
| <i>Utah</i>           | <i>31 (23-65)</i>                                      | <i>30</i>     | <i>Possible</i>         | <i>1 (0-36)</i>                                          |
| <b>Vermont</b>        | <b>5 (4-6)</b>                                         | <b>3</b>      | <b>Yes</b>              | <b>1 (1-3)</b>                                           |
| <b>Virginia</b>       | <b>150 (141-160)</b>                                   | <b>108</b>    | <b>Yes</b>              | <b>42 (33-52)</b>                                        |
| <b>Washington</b>     | <b>105 (100-111)</b>                                   | <b>80</b>     | <b>Yes</b>              | <b>26 (20-32)</b>                                        |
| West Virginia         | 26 (25-28)                                             | 35            | No                      | -                                                        |
| <i>Wisconsin</i>      | <i>70 (65-80)</i>                                      | <i>68</i>     | <i>Possible</i>         | <i>1 (0-12)</i>                                          |
| <i>Wyoming</i>        | <i>4 (3-11)</i>                                        | <i>3</i>      | <i>Possible</i>         | <i>1 (0-8)</i>                                           |

Abbreviations: CKRT, continuous kidney replacement therapy; COVID-19, coronavirus disease 2019; UI, uncertainty interval; AKI 3D, acute kidney injury stage 3 requiring dialysis.

<sup>a</sup>This table demonstrates the greatest shortage in CKRT projected by the model (within the model assumptions) when the input parameters are as follows:

- i. Incidence of AKI 3D requiring CKRT among hospitalized patients with COVID-19: 6.9%
- ii. Time from hospitalization to AKI 3D: 5 days
- iii. Duration of CKRT: 9 days
- iv. Non-COVID-19 CKRT demand multiplier during the initial wave of the COVID-19 pandemic: 0.75
- v. Prevalence of AKI 3D among ICU patients pre-COVID-19: 6.6%
- vi. CKRT capacity multiplier: 1.25

The unit for demand and capacity is CKRT machines. CKRT capacity is derived from average daily ICU bed occupancy rates (see Table S1). The bolded rows represent states that are projected to encounter a shortage (where CKRT capacity is below the 95% UI of CKRT demand). The italicized rows represent states that could encounter a possible shortage (where CKRT capacity is within the 95% UI of CKRT demand). Minor discrepancies in numerical values in the table are due to rounding.

<sup>b</sup>We derived these estimates from the Institute for Health Metrics and Evaluation model and present them as means with 95% UI.<sup>11</sup>

### Supplementary References

1. Harvard Global Health Institute COVID-19 model.  
[https://docs.google.com/spreadsheets/d/1XUVyZF3X\\_4m72ztFnXZFvDKn5Yys1aKgu2Zmefd7wVo/edit#gid=1576394115](https://docs.google.com/spreadsheets/d/1XUVyZF3X_4m72ztFnXZFvDKn5Yys1aKgu2Zmefd7wVo/edit#gid=1576394115).  
Accessed July 6, 2020.
2. American Hospital Association, AHA Hospital Statistics, Chicago, IL. American Hospital Association 2018.
3. American Hospital Directory. Hospital Statistics by State. [https://www.ahd.com/state\\_statistics.html](https://www.ahd.com/state_statistics.html). Accessed July 6, 2020.
4. Jewell NP, Lewnard JA, Jewell BL. Predictive Mathematical Models of the COVID-19 Pandemic: Underlying Principles and Value of Projections. *JAMA*. 2020;323(19):1893-1894.
5. Jewell NP, Lewnard JA, Jewell BL. Caution Warranted: Using the Institute for Health Metrics and Evaluation Model for Predicting the Course of the COVID-19 Pandemic. *Ann Intern Med*. 2020;173(3):226-227.
6. Hirsch JS, Ng JH, Ross DW, et al. Acute Kidney Injury in Patients Hospitalized with COVID-19. *Kidney Int*. 2020;98(1):209-218.
7. Goyal P, Choi JJ, Pinheiro LC, et al. Clinical Characteristics of Covid-19 in New York City. *N Engl J Med*. 2020;382(24):2372-2374.
8. Cummings MJ, Baldwin MR, Abrams D, et al. Epidemiology, Clinical Course, and Outcomes of Critically Ill Adults With COVID-19 in New York City: A Prospective Cohort Study. *Lancet*. 2020;395(10239):1763-1770.



9. Argenziano MG, Bruce SL, Slater CL, et al. Characterization and Clinical Course of 1000 Patients with Coronavirus Disease 2019 in New York: Retrospective Case Series. *BMJ*. 2020;369:m1996.
10. Richardson S, Hirsch JS, Narasimhan M, et al. Presenting Characteristics, Comorbidities, and Outcomes Among 5700 Patients Hospitalized With COVID-19 in the New York City Area. *JAMA*. 2020;323(20):2052-2059.
11. Murray CJ. Forecasting COVID-19 Impact on Hospital Bed-days, ICU-days, Ventilator-days and Deaths by US State in the Next 4 Months. Preprint at <https://www.medrxiv.org/content/10.1101/2020.03.27.20043752v1>. Accessed July 6, 2020.
12. Zhou F, Yu T, Du R, et al. Clinical Course and Risk Factors for Mortality of Adult Inpatients with COVID-19 in Wuhan, China: A Retrospective Cohort Study. *Lancet*. 2020;395(10229):1054-1062.
13. Palevsky PM, Zhang JH, O’Connor TZ, et al. Intensity of Renal Support in Critically Ill Patients with Acute Kidney Injury. *N Engl J Med*. 2008;359(1):7-20.
14. Melo FAF, Macedo E, Fonseca Bezerra AC, et al. A Systematic Review and Meta-analysis of Acute Kidney Injury in the Intensive Care Units of Developed and Developing Countries. *PLoS One*. 2020;15(1):e0226325.
